# Supplementary material for: Genomic Epidemiology Insights on NDM-Producing Pathogens Revealed the Pivotal Role of Plasmids on blaNDM Transmission
Source: PubMed Central journal article supplement (PMC9049954; doi:10.1128/spectrum.02156-21), 2022-02-28
Supplement: spectrum02156-21_supp_1_seq11.pdf [file spectrum02156-21_supp_1_seq11.pdf]

**Supplementary Table 1. Primer sequences used in this study.**

| Primers | Primer sequences         | Products (bp) | Genes                     |
|---------|--------------------------|---------------|---------------------------|
| NDM-F   | GCAGCTTGTCGGCCATGCGGGC   | 782           | <i>bla</i> <sub>NDM</sub> |
| NDM-R   | GGTCGCGAAGCTGAGCACCGCAT  |               |                           |
| IMP-F   | GAAGGCGTTTATGTTCATAC     | 587           | <i>bla</i> <sub>IMP</sub> |
| IMP-R   | GTACGTTTCAAGAGTGATGC     |               |                           |
| KPC-F   | TGGAAACTCCCCTACCTCTT     | 900           | <i>bla</i> <sub>KPC</sub> |
| KPC-R   | CCACACTGATGCGTTCGTAT     |               |                           |
| VIM-F   | CGCGGTCGCCATCTTCACG      | 389           | <i>bla</i> <sub>VIM</sub> |
| VIM-R   | TGCCCCGAGCCAGTACCGCCAATG |               |                           |
| OXA-F   | GGCAACCTCGTCGCCTTTA      | 438           | <i>bla</i> <sub>OXA</sub> |
| OXA-R   | GCAAGTCGGCGTGTTTTCG      |               |                           |
| MCR-1-F | ATCAGCCAAACCTATCCCATCG   | 564           | <i>mcr-1</i>              |
| MCR-1-R | GCAGACGCACAGCAATGCCTAT   |               |                           |
| SHV-F   | ATCGTGGAGTGATCGACATT     | 1565          | <i>bla</i> <sub>SHV</sub> |
| SHV-R   | ATCGTGGAGTGATCGACATT     |               |                           |
| TEM-F   | ATAAAATTCTTGAAGAC        | 1075          | <i>bla</i> <sub>TEM</sub> |
| TEM-R   | TTACCAATGCTTAATCA        |               |                           |

**Supplementary Table 2. Antimicrobial susceptibility testing (MICs, mg/L) of 81 *bla*<sub>NDM</sub>-positive strains.**

| Isolates   | MEM | IPM | ATM  | CAZ   | CHL  | CIP   | CST  | FOS   | GEN  | AMK  | AMP  | TET  | TGC  | CFX  | CFZ  | TZP   | SXT  |
|------------|-----|-----|------|-------|------|-------|------|-------|------|------|------|------|------|------|------|-------|------|
| EC-13-1    | 16  | 4   | 64   | >256  | 256  | 8     | ≤0.5 | 8     | 32   | 16   | >256 | 256  | 1    | >256 | >256 | >256  | >32  |
| ECL-13-2   | 64  | 32  | 64   | >128  | >128 | 16    | 2    | 32    | >128 | >128 | >256 | 16   | 1    | >256 | >256 | 512   | > 32 |
| ECL-13-4   | 32  | 32  | >128 | >128  | 32   | >32   | 1    | ≤1    | 1    | 16   | >256 | 16   | 4    | >256 | >256 | >1024 | > 32 |
| KP-13-7    | 8   | 32  | >128 | >128  | >256 | >32   | 2    | 16    | >128 | >128 | >256 | 64   | 8    | >256 | >256 | >1024 | > 32 |
| KP-13-8    | 8   | 64  | >128 | >128  | >256 | >32   | 0.5  | 16    | 128  | 4    | >256 | 32   | 2    | 32   | >256 | 1024  | > 32 |
| KP-13-11   | 8   | 64  | >128 | >128  | 64   | 0.5   | 32   | 16    | 1    | 8    | >256 | 32   | 2    | >256 | >256 | 1024  | > 32 |
| CR-13-12   | 16  | 64  | >128 | >128  | >256 | 1     | 8    | 16    | 256  | 2    | >256 | 64   | 1    | >256 | >256 | >1024 | > 32 |
| KP-13-14   | 16  | 64  | >128 | >128  | 8    | 8     | 1    | 16    | 32   | 2    | >256 | 64   | 1    | >256 | >256 | 1024  | > 32 |
| EC-13-22   | 16  | 32  | >128 | >128  | 8    | 32    | 2    | ≤1    | 128  | 2    | >256 | 64   | 0.5  | >256 | >256 | >1024 | > 32 |
| EC-13-30   | 32  | 32  | >128 | >128  | 256  | 16    | 1    | 512   | 128  | 4    | >256 | 4    | 0.25 | >256 | >256 | >1024 | > 32 |
| EC-13-31   | 16  | 32  | >64  | >128  | >128 | 16    | 0.5  | 512   | 128  | 4    | >256 | 64   | 1    | >256 | >256 | >512  | > 32 |
| EC-13-33   | 4   | 16  | >128 | >128  | 16   | 32    | 2    | ≤1    | 2    | >128 | >256 | 32   | 0.25 | >256 | >256 | 1024  | > 32 |
| CF-13-34   | 8   | 16  | >128 | >128  | 16   | 8     | 2    | ≤1    | 128  | 2    | >256 | >128 | 0.5  | >256 | >256 | 512   | > 32 |
| CR-13-36   | 4   | 64  | 128  | >128  | 8    | ≤0.12 | 2    | 4     | 1    | 1    | >256 | 8    | 1    | >256 | >256 | 512   | > 32 |
| ECL-13-37  | 32  | 64  | >128 | >128  | 16   | 32    | 1    | 32    | >256 | >128 | >256 | 64   | 1    | >256 | >256 | 1024  | > 32 |
| EC-13-49   | 16  | 8   | >128 | >128  | 16   | 32    | 1    | ≤1    | 128  | >128 | >256 | 4    | 0.5  | >256 | >256 | >1024 | > 32 |
| PM58       | 16  | 64  | >128 | >128  | >256 | 16    | >128 | >1024 | >256 | >128 | >256 | 128  | 8    | >256 | >256 | 32    | > 32 |
| KP-14-6    | 64  | 32  | 2    | ≤0.25 | 16   | ≤0.12 | 2    | 16    | 64   | 2    | >256 | 64   | 0.5  | >256 | >256 | >1024 | 0.5  |
| CF-14-50   | 8   | 16  | 128  | >128  | >256 | 16    | 0.5  | ≤1    | 64   | 1    | >256 | 8    | 1    | >256 | >256 | 1024  | > 32 |
| EC-14-54   | 64  | 64  | 64   | 64    | >64  | >64   | 2    | ≤1    | 64   | 8    | >256 | >64  | 2    | >256 | >256 | >1024 | > 32 |
| EC-14-55   | 32  | 32  | >64  | >32   | 4    | 16    | 0.5  | ≤1    | >32  | <2   | >256 | >32  | 0.5  | >256 | >256 | >1024 | >32  |
| ECL-14-56  | 8   | 32  | 128  | >128  | 256  | 32    | 2    | 4     | 64   | 2    | >256 | 8    | 1    | >256 | >256 | 512   | > 32 |
| ECL-14-58  | 16  | 32  | 128  | >128  | 16   | 2     | 4    | 32    | <0.5 | 2    | >256 | 16   | 4    | >256 | >256 | >1024 | > 32 |
| ECL-14-60  | 16  | 64  | 2    | >128  | 16   | 16    | 2    | 32    | >125 | >256 | >256 | 16   | 4    | >256 | >256 | 1024  | 1.5  |
| KA-14-61   | 16  | 16  | 32   | >128  | 8    | 0.25  | 1    | 4     | 64   | 2    | >256 | 16   | 0.5  | >256 | >256 | 1024  | > 32 |
| KO-14-71   | 32  | 32  | 64   | 128   | 4    | 0.5   | 1    | 256   | 128  | 4    | >256 | 32   | 1    | >256 | >256 | 512   | > 32 |
| KOR-14-72  | 32  | 0.5 | 32   | 8     | >256 | 8     | 1    | 16    | >256 | >256 | >256 | 32   | 0.5  | >256 | >256 | 1024  | > 32 |
| EC-14-2-9  | 64  | 64  | 64   | 64    | >64  | >64   | 2    | ≤1    | >128 | >64  | >256 | >64  | 0.25 | >256 | >256 | >1024 | > 32 |
| EC-14-2-77 | 64  | 64  | 128  | >128  | 4    | 16    | 1    | ≤1    | >128 | >128 | >256 | 32   | 1    | >256 | >256 | 1024  | > 32 |

|             |     |     |       |      |      |       |      |       |      |      |      |      |        |      |      |       |       |
|-------------|-----|-----|-------|------|------|-------|------|-------|------|------|------|------|--------|------|------|-------|-------|
| EC-14-2-92  | 16  | 64  | >64   | >128 | >128 | 8     | 1    | 1024  | >128 | >128 | >256 | 32   | 0.25   | >256 | >256 | >1024 | >32   |
| EC-14-2-94  | 16  | 32  | 64    | >128 | >128 | 8     | 2    | >1024 | 2    | 2    | >256 | 32   | ≤0.25  | >256 | >256 | >1024 | >32   |
| KP-14-2-131 | 4   | 32  | 32    | >128 | >256 | 0.5   | 4    | 16    | 128  | 2    | >256 | 4    | 1      | >256 | >256 | >1024 | >32   |
| EC-14-2-134 | 16  | 32  | >64   | >128 | 16   | 8     | 0.5  | 4     | >128 | >128 | >256 | 8    | ≤0.25  | >256 | >256 | >1024 | >32   |
| EC-15-3     | 64  | 128 | 128   | 128  | >256 | 64    | 1    | 1024  | >512 | >256 | >256 | 64   | 2      | >256 | >256 | >512  | >32   |
| EC-15-10    | 16  | 64  | 64    | >128 | 4    | ≤0.12 | ≤0.5 | 4     | 1    | 2    | >256 | 2    | ≤0.25  | >256 | >256 | >512  | >32   |
| CF-15-33    | 8   | 32  | 64    | >128 | 32   | 0.25  | 1    | ≤1    | 1    | 2    | >256 | 8    | 1      | >256 | >256 | >512  | <20   |
| EC-15-34    | 64  | 128 | 64    | >128 | >128 | 8     | ≤0.5 | >1024 | >128 | >128 | >256 | >128 | 0.5    | >256 | >256 | 1024  | >32   |
| KP-15-35    | 4   | 32  | 64    | >128 | 4    | 0.12  | 4    | 8     | 2    | 1    | >256 | 4    | 1      | >256 | >256 | >512  | >32   |
| CF-15-43    | 4   | 16  | 128   | >128 | 8    | 16    | 1    | ≤1    | 256  | 8    | >256 | 4    | 1      | >256 | >256 | >512  | >32   |
| CF-15-61    | 8   | 16  | 64    | >128 | >256 | 16    | 0.5  | ≤1    | 64   | 1    | >256 | 8    | 0.5    | >256 | >256 | 512   | >32   |
| EC-15-2-1   | 32  | 64  | 64    | 64   | >64  | >64   | 2    | 32    | >64  | 2    | >256 | 2    | ≤0.25  | >256 | >256 | >512  | ≤2    |
| EC-15-2-2   | 16  | 32  | 64    | 64   | >64  | >64   | 1    | ≤1    | >64  | 2    | >256 | 16   | ≤0.25  | >256 | >256 | >512  | >32   |
| EC-15-2-5   | 64  | 64  | 64    | 64   | 8    | >64   | 2    | 2     | >64  | >64  | >256 | 64   | ≤0.125 | >256 | >256 | >1024 | >32   |
| KP-15-2-6   | 32  | 32  | >128  | >128 | 32   | 64    | 4    | ≤1    | 1    | 8    | >256 | 32   | 2      | >256 | >256 | >512  | >32   |
| EC-15-2-14  | 64  | 64  | 64    | 64   | 8    | >64   | 2    | ≤1    | >64  | 8    | >256 | 32   | 0.25   | >256 | >256 | >1024 | >32   |
| SM-15-2-16  | 4   | 32  | 32    | 64   | 64   | 0.5   | >16  | 8     | 2    | 4    | >256 | 4    | 2      | >256 | >256 | 512   | 0.5   |
| EC-15-2-24  | 32  | 64  | 64    | 64   | >64  | >64   | 1    | ≤1    | >64  | 16   | >256 | 16   | ≤0.125 | >256 | >256 | >1024 | >32   |
| EC-15-2-26  | 64  | 128 | >64   | >64  | 8    | >64   | 2    | 512   | >64  | >64  | >256 | 1    | ≤0.125 | >256 | >256 | >1024 | 0.06  |
| CF-15-2-29  | 32  | 32  | >128  | >128 | >256 | >64   | 2    | ≤1    | 256  | 32   | >256 | 32   | 1      | >256 | >256 | >512  | >32   |
| EC-15-2-35  | 32  | 32  | >64   | >64  | >64  | >64   | 2    | ≤1    | >64  | 16   | >256 | 16   | ≤0.125 | >256 | >256 | >1024 | >32   |
| EC-15-2-47  | 32  | 64  | 64    | 64   | >64  | >64   | 2    | ≤1    | >64  | 16   | >256 | 8    | ≤0.125 | >256 | >256 | >1024 | >32   |
| Pr-15-2-50  | 16  | 16  | >1024 | >64  | 8    | 16    | -    | 256   | -    | >64  | -    | -    | -      | >256 | -    | >128  | >32   |
| EC-15-2-51  | 32  | 32  | 64    | 64   | >64  | >64   | 1    | ≤1    | >64  | 64   | >256 | 32   | ≤0.125 | >256 | >256 | >1024 | 0.032 |
| KP-15-2-52  | 64  | 64  | ≤0.25 | >64  | 4    | ≤0.12 | 4    | 8     | 4    | 4    | >256 | 4    | 0.25   | >256 | >256 | >1024 | 0.125 |
| EC-15-2-56  | 64  | 128 | >64   | >64  | 8    | >64   | 2    | 2     | 8    | 8    | >256 | 2    | ≤0.125 | >256 | >256 | >1024 | 0.094 |
| KP-15-2-62  | 64  | 64  | 1     | >64  | 32   | 2     | 2    | 256   | 4    | 4    | >256 | 4    | 0.25   | >256 | >256 | >1024 | >32   |
| EC-15-2-65  | 128 | 256 | 64    | 64   | 32   | 32    | 1    | 1024  | >64  | >64  | >256 | 4    | ≤0.125 | >256 | >256 | >1024 | >32   |
| CF-15-2-98  | 32  | 32  | 32    | 128  | 16   | 8     | 4    | 1024  | 32   | 16   | >256 | 32   | 1      | >256 | >256 | >512  | >32   |
| KP-15-2-113 | 4   | 16  | 128   | >128 | 4    | 16    | >16  | 512   | 128  | 16   | >256 | 4    | 2      | >256 | >256 | 512   | >32   |
| EC-15-2-132 | 32  | 8   | >128  | >128 | 32   | 8     | ≤0.5 | 512   | >64  | 64   | 4    | 16   | 0.5    | >256 | >256 | 16    | >32   |

|             |    |     |       |      |      |     |      |       |      |      |      |      |     |      |      |      |      |
|-------------|----|-----|-------|------|------|-----|------|-------|------|------|------|------|-----|------|------|------|------|
| EC-15-2-152 | 64 | 64  | 64    | 64   | >64  | >64 | 1    | ≤1    | >64  | 4    | >256 | 64   |     | >256 | >256 | >512 | 0.38 |
| EC-15-2-153 | 16 | 64  | 64    | >128 | 256  | 2   | 2    | 16    | 512  | 8    | >256 | 16   | 8   | >256 | >256 | >512 | >32  |
| EC-15-2-159 | 64 | 512 | 64    | 64   | 16   | >64 | 2    | >1024 | >64  | >64  | >256 | 64   |     | >256 | >256 | >512 | >32  |
| CF-15-2-165 | 2  | 8   | ≤0.25 | 8    | 32   | 32  | >64  | >1024 | 8    | 8    | >256 | 2    | 0.5 | >256 | >256 | >512 | ≤2   |
| ECL-16-5    | 16 | 16  | 64    | >64  | >128 | 1   | 2    | 16    | >128 | 16   | >256 | 128  | 2   | >256 | >256 | >512 | ≤2   |
| ECL-16-7    | 32 | 32  | >64   | >64  | >128 | >16 | >256 | 64    | >128 | >128 | >256 | 128  | 8   | >256 | >256 | >512 | >32  |
| EC-16-10    | 16 | 16  | 0.5   | >64  | 16   | >16 | ≤0.5 | 4     | 2    | 2    | >256 | 128  | 1   | >256 | >256 | >512 | >32  |
| CF-16-17    | 8  | 16  | 64    | >64  | >128 | >16 | 1    | ≤1    | 2    | 4    | >256 | 64   | 2   | >256 | >256 | >512 | >32  |
| EC-16-20    | 32 | 32  | >64   | >64  | 128  | >16 | ≤0.5 | 4     | >128 | >128 | >256 | 128  | 0.5 | >256 | >256 | >512 | >32  |
| KO-16-21    | 16 | 32  | 64    | >64  | 128  | >16 | 1    | 32    | 128  | 4    | >256 | 4    | 2   | >256 | >256 | >512 | >32  |
| EC-16-35    | 32 | 32  | >64   | >64  | >128 | >16 | 1    | >1024 | >128 | >128 | >256 | 64   | 2   | >256 | >256 | >512 | >32  |
| EC-16-37    | 16 | 16  | 64    | >64  | 16   | 16  | 1    | 4     | >128 | >128 | >256 | 8    | 0.5 | >256 | >256 | >512 | >32  |
| EC-16-52    | 32 | 32  | >64   | >64  | >128 | >16 | 1    | 1024  | 128  | 4    | >256 | 64   | 2   | >256 | >256 | >512 | >32  |
| KP-16-57    | 32 | 64  | 64    | >64  | 4    | >16 | 2    | 16    | 128  | 2    | >256 | 32   | 1   | >256 | >256 | >512 | >32  |
| CF-16-58    | 32 | 64  | >64   | >64  | 32   | >16 | 2    | ≤1    | >128 | 2    | >256 | >128 | 2   | >256 | >256 | >512 | ≤2   |
| EC-16-59    | 64 | 64  | >64   | >64  | 16   | >16 | 1    | ≤1    | 128  | 4    | >256 | >128 | 0.5 | >256 | >256 | >512 | ≤2   |
| EC-16-60    | 32 | 16  | >64   | >64  | 4    | >16 | 2    | >1024 | 2    | 4    | >256 | 2    | 0.5 | >256 | >256 | >512 | >32  |
| CF-16-61    | 8  | 16  | >64   | >64  | >128 | 16  | 2    | 1024  | 128  | 2    | >256 | 8    | 2   | >256 | >256 | >512 | >32  |
| EC-16-74    | 32 | 32  | >64   | 64   | 16   | >16 | ≤0.5 | 4     | 128  | 2    | >256 | 128  | 2   | >256 | >256 | >512 | ≤2   |
| ECL-16-76   | 32 | 64  | >64   | >64  | >128 | >16 | 2    | 32    | >128 | >128 | >256 | >128 | 4   | >256 | >256 | >512 | ≤2   |
| EC-16-79    | 64 | 128 | 32    | >64  | 8    | 16  | ≤0.5 | 8     | 128  | 4    | >256 | 32   | 1   | >256 | >256 | >512 | >32  |

**Abbreviations:** MEM, meropenem; IPM, imipenem; ATM, aztreonam; CAZ, ceftazidime; CHL, chloramphenicol; CIP, ciprofloxacin; CST, colistin; FOS, fosfomicin sodium; GEN, gentamicin; AMK, amikacin; AMP, ampicillin; TET, tetracycline; TGC, tigecycline; CFX, cefoxitin; CFZ, ceftazidime; TZP, Piperacillin–tazobactam; SXT, sulfamethoxazole/trimethoprim.

**Supplementary Table 3. Basic information of 42 ST167 *bla*<sub>NDM</sub>-bearing *E. coli* in NCBI nr database and this study.**

| Strain                     | BioSample    | Host         | Source       | NDM-type | Region      |
|----------------------------|--------------|--------------|--------------|----------|-------------|
| 51008369SK1                | SAMN09381942 | Dog          | wound liquid | NDM-5    | Switzerland |
| ECOL-18-VL-LA-PA-Ryan-0026 | SAMN11230749 | Dog          | trach wash   | NDM-5    | USA         |
| FDAARGOS_434               | SAMN07312478 | Homo sapiens | Rectal       | NDM-5    | Canada      |
| CRE1493                    | SAMN06198937 | Homo sapiens | Rectal Swab  | NDM-5    | Shenzhen    |
| ECONIH6                    | SAMN05341196 | Homo sapiens | swab         | NDM-5    | USA         |
| AR_0150                    | SAMN04014991 | -            | -            | NDM-5    | -           |
| AR_0151                    | SAMN04014992 | -            | -            | NDM-5    | -           |
| AR_0149                    | SAMN04014990 | -            | -            | NDM-7    | -           |
| AR_0162                    | SAMN04015003 | -            | -            | NDM-7    | -           |
| Y5                         | SAMN04299569 | Homo sapiens | urine        | NDM-1    | Zhejiang    |
| AR435                      | SAMN07291528 | -            | -            | NDM-1    | -           |
| M217                       | SAMD00059754 | Homo sapiens | blood        | NDM-5    | Myanmar     |
| CREC-629                   | SAMN07944243 | Homo sapiens | urine        | NDM-7    | South Korea |
| ECWJ1                      | SAMN09435562 | Homo sapiens | urine        | NDM-5    | Zhejiang    |
| 163                        | SAMN13951917 | environment  | -            | NDM-5    | Switzerland |
| 164                        | SAMN13951916 | environment  | -            | NDM-5    | Switzerland |
| 100                        | SAMN11872785 | Homo sapiens | Urine        | NDM-5    | Italy       |
| 91                         | SAMN11872784 | Homo sapiens | Stool        | NDM-5    | Italy       |
| 92                         | SAMN11872786 | Homo sapiens | Stool        | NDM-5    | Italy       |
| 311                        | SAMN11872787 | Homo sapiens | Stool        | NDM-5    | Italy       |
| L665                       | SAMN10219249 | Homo sapiens | feces        | NDM-5    | Zhejiang    |

|             |              |              |         |       |                |
|-------------|--------------|--------------|---------|-------|----------------|
| L612        | SAMN10219248 | Homo sapiens | feces   | NDM-5 | Zhejiang       |
| L610        | SAMN10219247 | Homo sapiens | feces   | NDM-5 | Zhejiang       |
| L743        | SAMN10219253 | Homo sapiens | feces   | NDM-5 | Zhejiang       |
| 947385799   | SAMN04011432 | Homo sapiens | urine   | NDM-5 | South Africa   |
| 52148       | SAMN14421542 | Homo sapiens | urine   | NDM-5 | Czech Republic |
| EC-13-30    | SAMN20568146 | Homo sapiens | secreta | NDM-5 | Zhengzhou      |
| EC-13-31    | SAMN20568144 | Homo sapiens | blood   | NDM-5 | Zhengzhou      |
| EC-13-49    | SAMN20568151 | Homo sapiens | urine   | NDM-1 | Zhengzhou      |
| EC-14-2-9   | SAMN20568171 | Homo sapiens | sputum  | NDM-5 | Zhengzhou      |
| EC-14-2-92  | SAMN20568169 | Homo sapiens | blood   | NDM-5 | Zhengzhou      |
| EC-14-2-94  | SAMN20568170 | Homo sapiens | urine   | NDM-5 | Zhengzhou      |
| EC-14-54    | SAMN20568164 | Homo sapiens | sanies  | NDM-5 | Zhengzhou      |
| EC-15-2-1   | SAMN20568196 | Homo sapiens | urine   | NDM-5 | Zhengzhou      |
| EC-15-2-159 | SAMN20568201 | Homo sapiens | urine   | NDM-5 | Zhengzhou      |
| EC-15-2-26  | SAMN20568194 | Homo sapiens | urine   | NDM-5 | Zhengzhou      |
| EC-15-2-5   | SAMN20568172 | Homo sapiens | sputum  | NDM-5 | Zhengzhou      |
| EC-15-2-56  | SAMN20568184 | Homo sapiens | urine   | NDM-5 | Zhengzhou      |
| EC-16-35    | SAMN20568209 | Homo sapiens | ascites | NDM-5 | Zhengzhou      |
| EC-16-59    | SAMN20568214 | Homo sapiens | tissue  | NDM-5 | Zhengzhou      |
| EC-16-60    | SAMN20568215 | Homo sapiens | sputum  | NDM-5 | Zhengzhou      |
| EC-16-7     | SAMN20568203 | Homo sapiens | urine   | NDM-1 | Zhengzhou      |

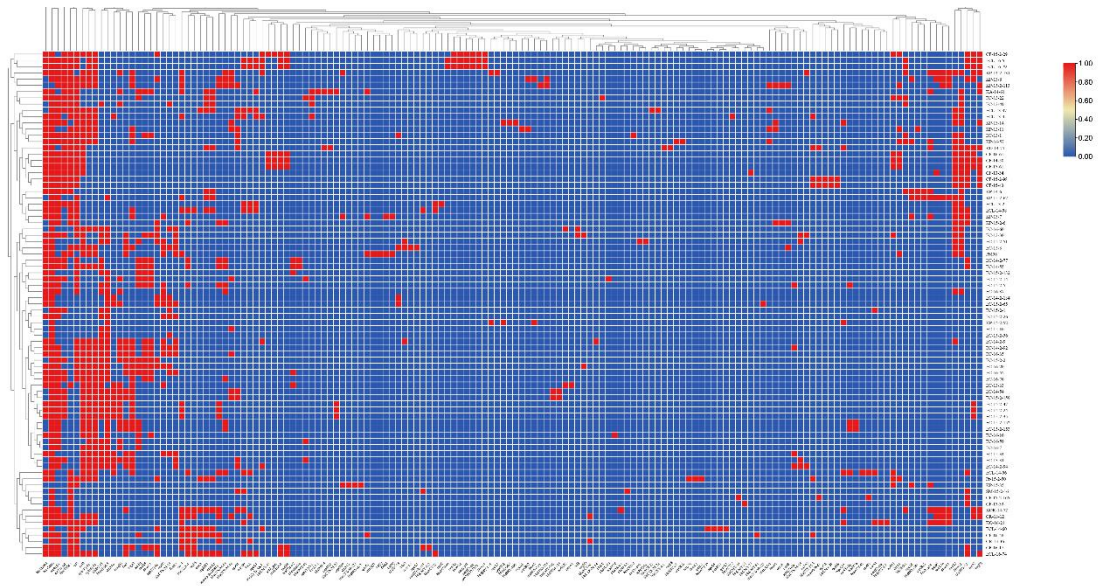

**Supplementary Figure 1. Heat map of the resistance genes carried by *bla*<sub>NDM</sub>-positive strains with whole genome sequences. Red represents the resistance gene carried in the strain.**

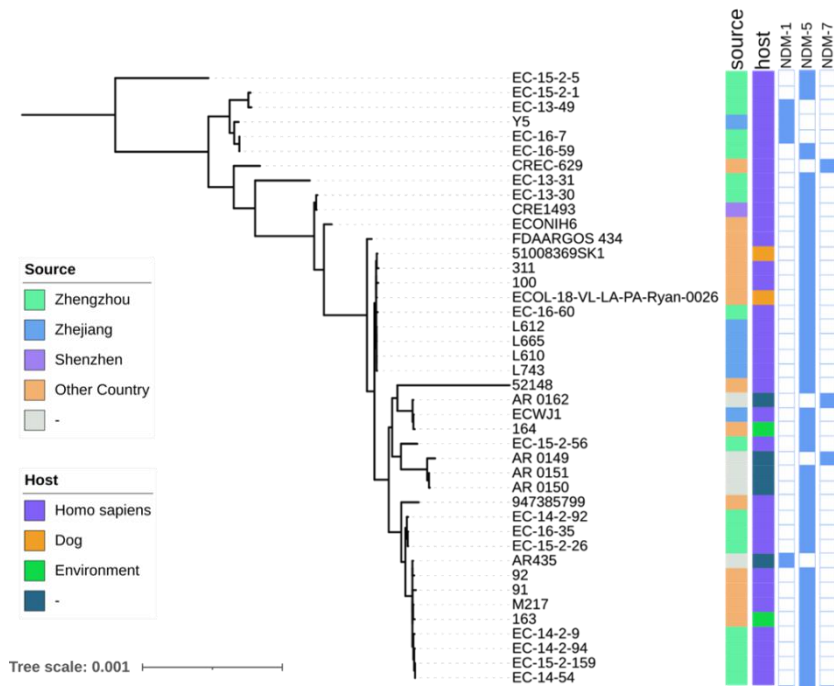

**Supplementary Figure 2. Phylogenetic tree of the 42 ST167 *bla*<sub>NDM</sub>-positive *E. coli* strains analysed in this study and NCBI nr database.** Branch lengths and scale bar represent number of nucleotide substitutions per site.



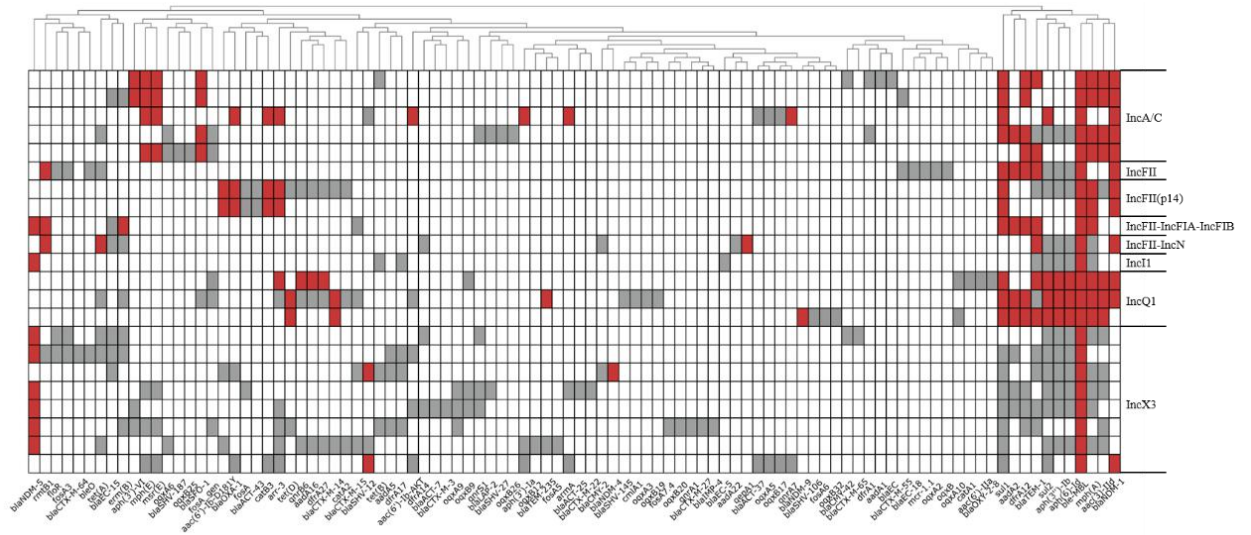

**Supplementary Figure 3. Heatmap showing the distribution of AMR genes carried by 22 strains that were sequenced by Nanopore sequencing.** Each row in the heat map represents one isolate and grouped by incompatibility types of the *bla*<sub>NDM</sub>-harbouring plasmids. Red squares indicate AMR genes located on the *bla*<sub>NDM</sub>-harbouring plasmids. The total red and gray squares in each row represent the AMR in the entire genome of each strain.

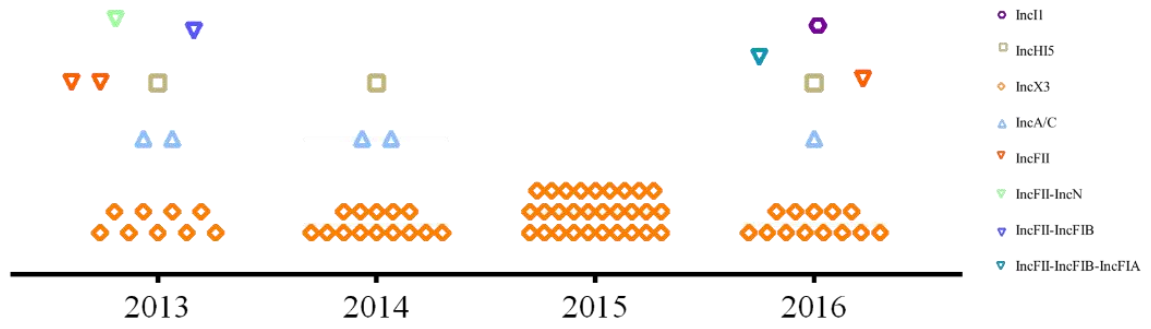

**Supplementary Figure 4. Distribution of the replicon sequence types of *bla*<sub>NDM</sub>-positive plasmids, based on the sampling dates. One point represents one sample.**

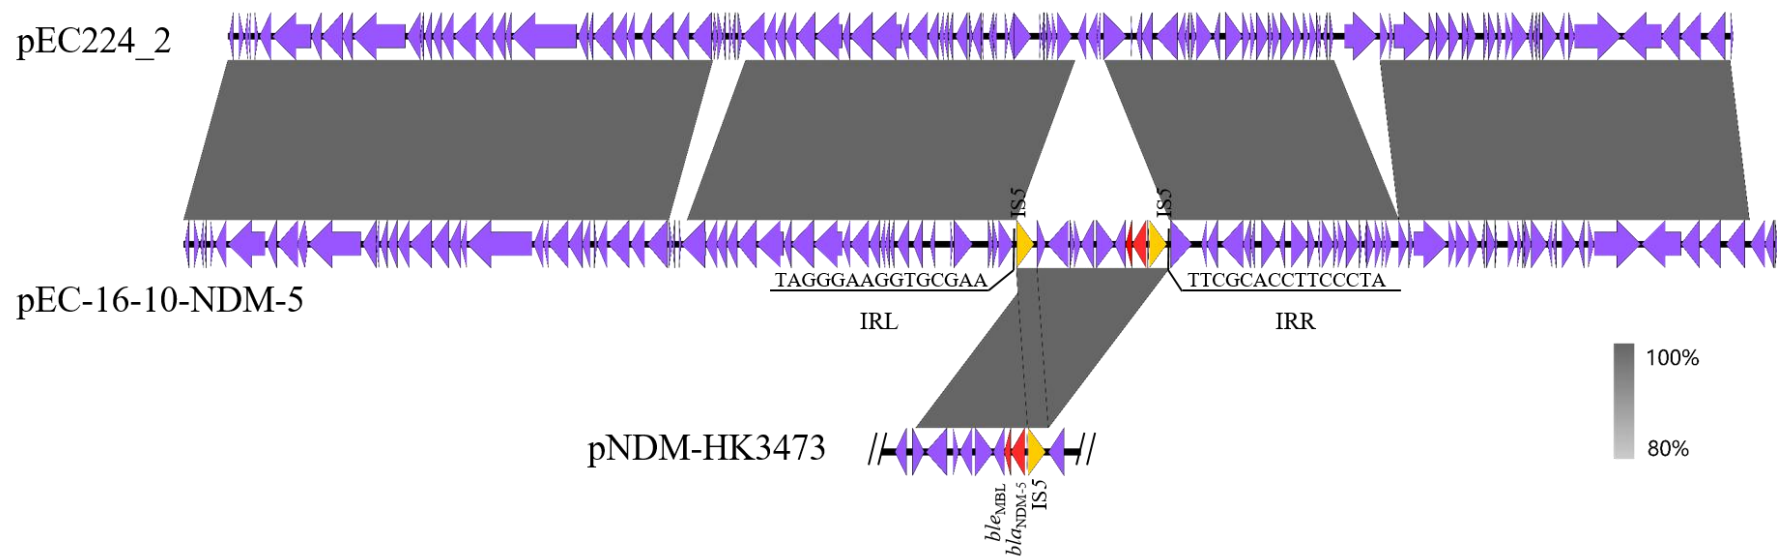

**Supplementary Figure 5. Linear comparison of *bla*<sub>NDM</sub>-bearing plasmids pEC-16-10-NDM5, pEC224\_2 and pNDM-HK3473. The gray regions indicate the homologous region between plasmid regions.**

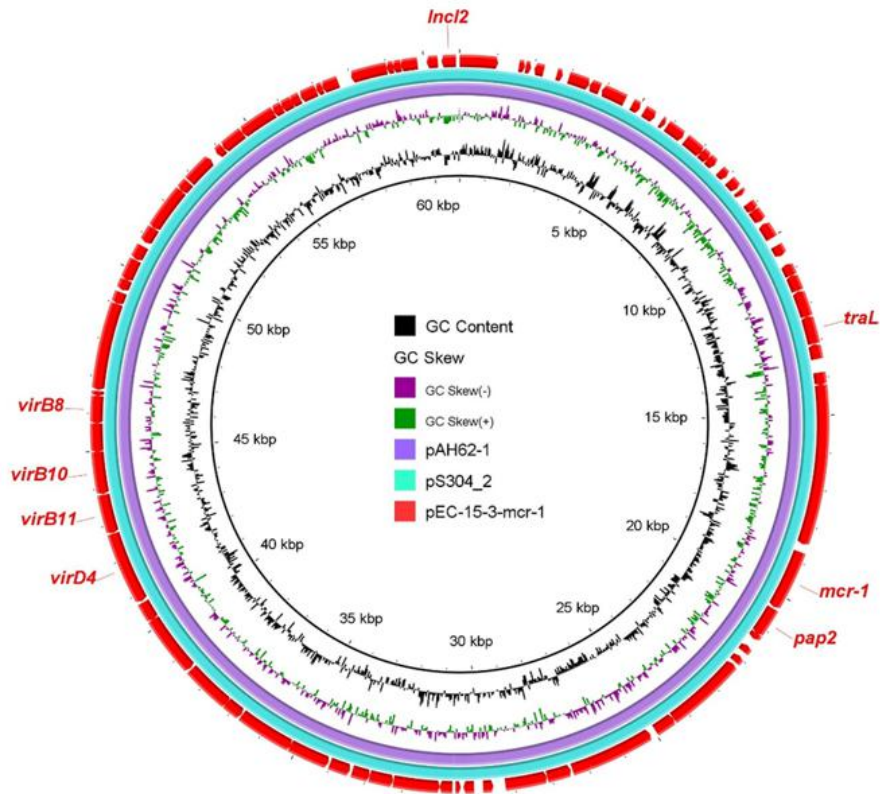

**Supplementary Figure 6. Circular comparison between *mcr-1*-bearing IncI2 plasmids found in this study and in the online database. The *mcr-1*-bearing IncI2 plasmid pEC-15-3-mcr-1 was used as the reference in the outermost ring.**

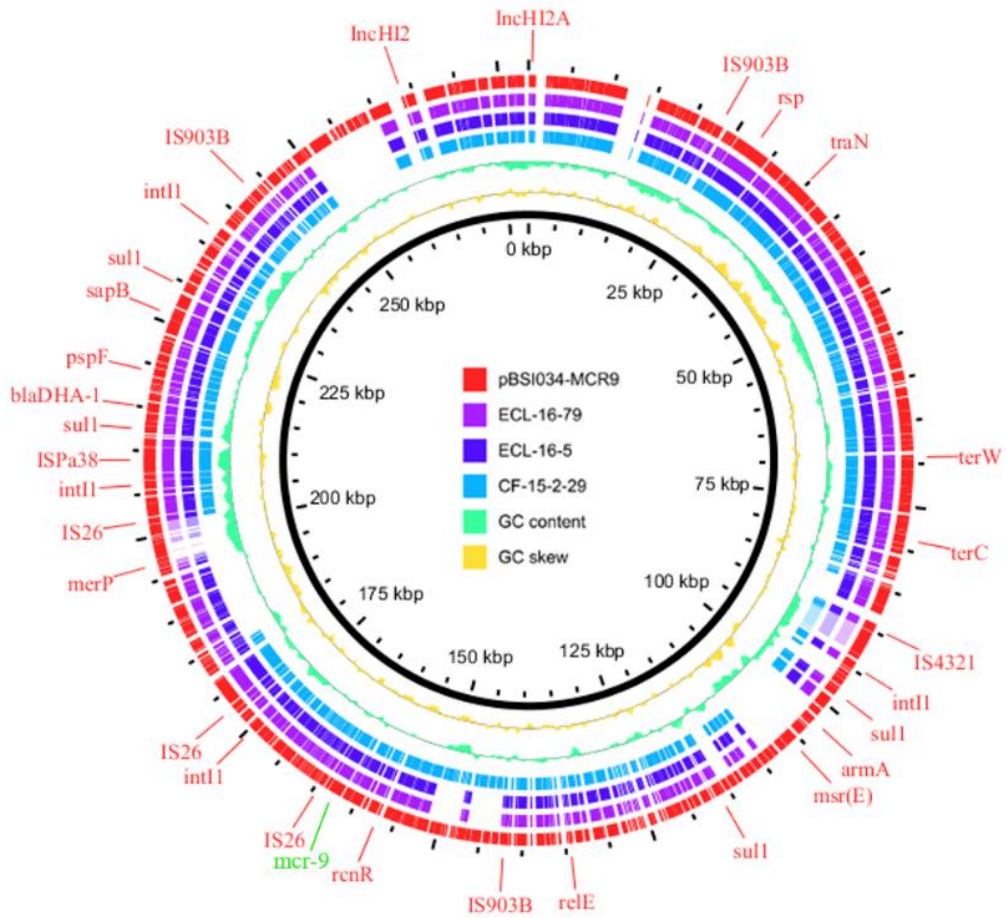

**Supplementary Figure 7. Comparative analysis of the structures of the *mcr-9*-bearing region found in this study and pBSI034-MCR9 (NZ\_MN937241).**

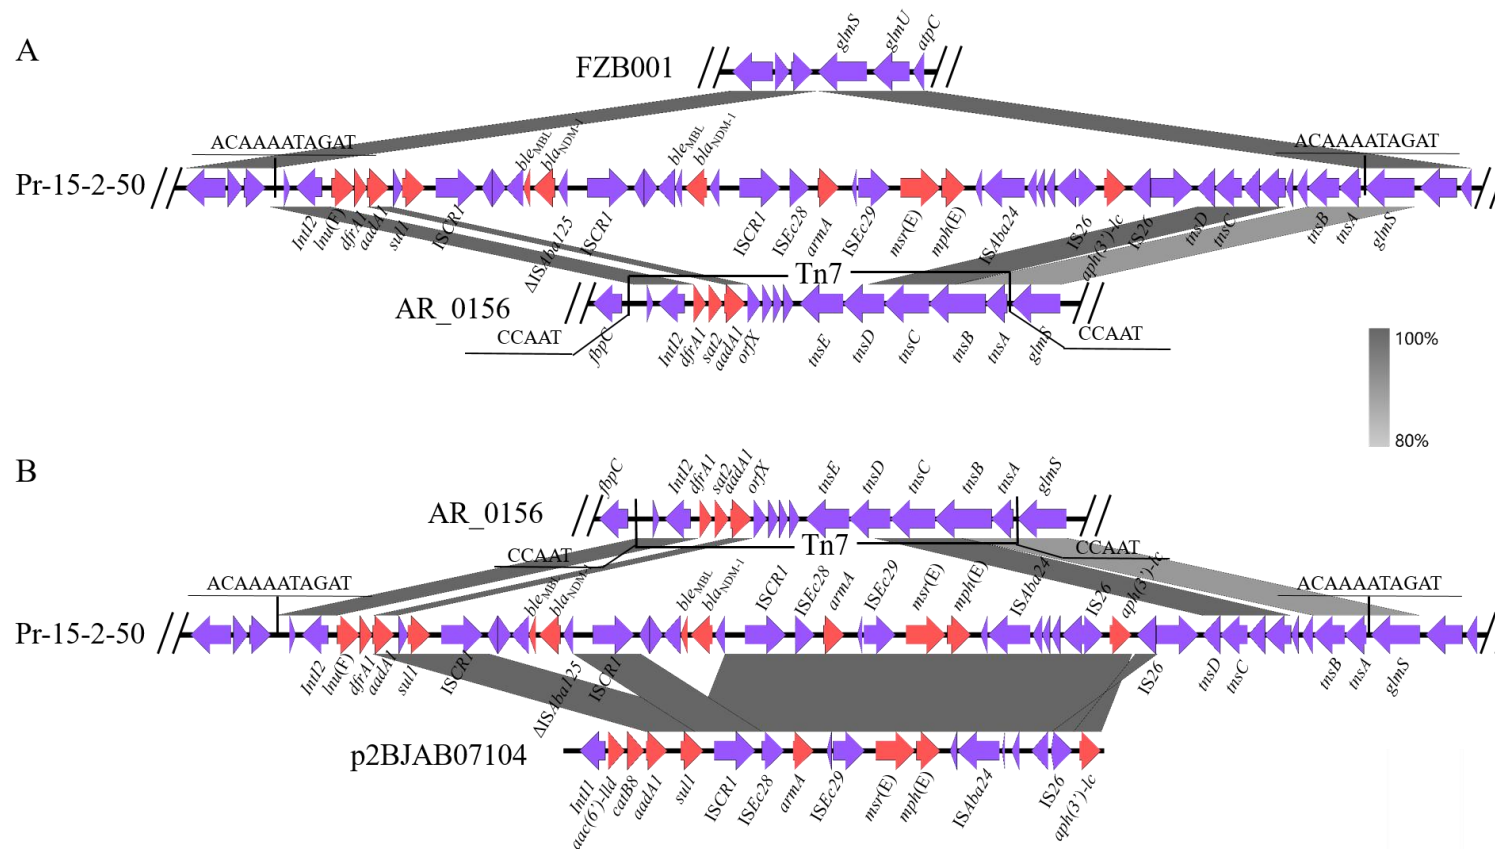

**Supplementary Figure 8. Genetic structure of Pr-15-2-50.** (A) Linear comparison between Pr-15-2-50, FZB001 and AR\_0156. (B) Linear comparison between Pr-15-2-50, AR\_0156 and p2BJAB07104. The gray regions indicate the homologous region between plasmid regions.
